# Supplementary material for: Involvement of CD4+ Foxp3+ Regulatory T Cells in Persistence of Leishmania donovani in the Liver of Alymphoplastic aly/aly Mice
Source: PubMed Central journal article supplement (PMC3424244; doi:10.1371/journal.pntd.0001798), 2012-08-21
Supplement: pntd.0001798.s002.pdf [file pntd.0001798.s002.pdf]

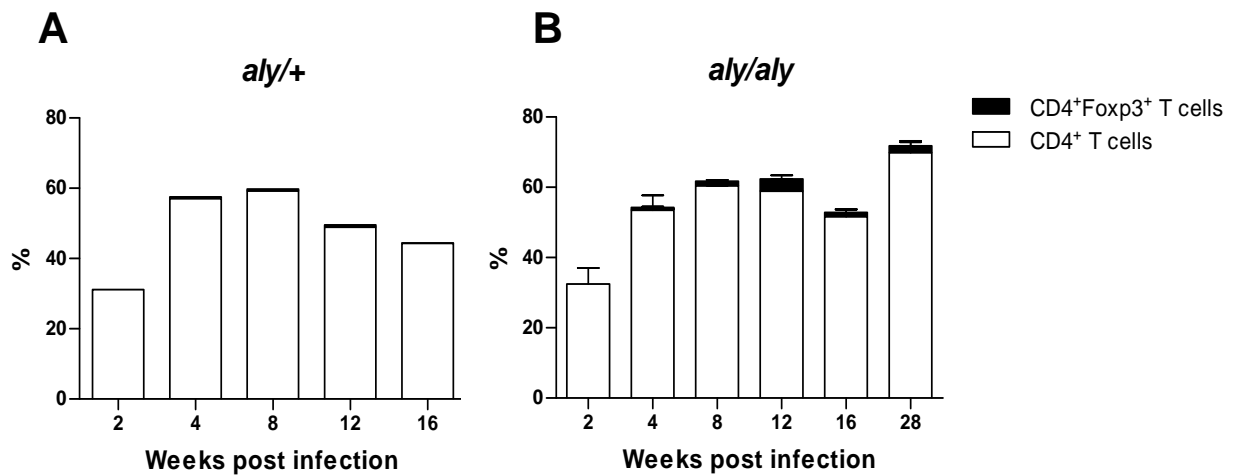

**Figure S2. Proportion of CD4<sup>+</sup>Foxp3<sup>+</sup> and CD4<sup>+</sup> T cells to gated hepatic lymphocytes during the course of *L. donovani* infection by flow cytometry analysis.**

Hepatic lymphocytes were isolated from the liver of *aly/+* and *aly/aly* mice at indicated time points after *L. donovani* infection and stained with anti-CD4, CD8 and Foxp3 antibodies. Percentage of CD4<sup>+</sup> T cells (white bars) and CD4<sup>+</sup>Foxp3<sup>+</sup> T cells (black bars) of *aly/+* (A) and *aly/aly* mice (B) are shown.
