# Supplementary material for: Involvement of CD4+ Foxp3+ Regulatory T Cells in Persistence of Leishmania donovani in the Liver of Alymphoplastic aly/aly Mice
Source: PubMed Central journal article supplement (PMC3424244; doi:10.1371/journal.pntd.0001798), 2012-08-21
Supplement: pntd.0001798.s003.pdf [file pntd.0001798.s003.pdf]

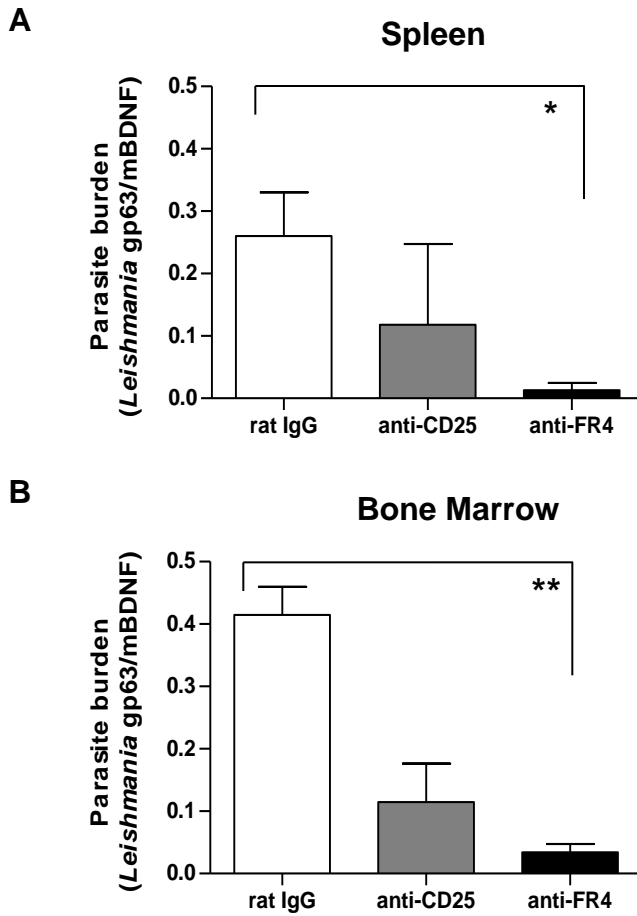

**Figure S3. Effects of anti-Treg antibody treatment on parasite burden in the spleen and bone marrow.**

The *L. donovani*-infected *aly/aly* mice were intraperitoneally injected with anti-CD25 or anti-FR4 mAb at 26 WPI, and parasite burden in the spleen (A) and bone marrow (B) was estimated by qPCR after 10 days of antibody treatment. \*  $p < 0.05$ ; \*\*  $p < 0.01$ .
